# Supplementary material for: RETRACTED: Arginine methylation of SHANK2 by PRMT7 promotes human breast cancer metastasis through activating endosomal FAK signalling
Source: eLife journal article supplement (doi:10.7554/elife.57617), 2020-08-26
Supplement: supp [file elife_poa_e57617_Supplementary_file_1.xlsx]

## Sheet: Sheet1
Sample No.	Age	Stage	TNM	Cancer Type	Subtype
N1	65	I	pT1bN0Mx	Invasive Ductal Breast Carcinoma (Adjacent normal tissues)	ER(+), PR(+), HER-2(-)
N2	47	I	pT2NxMx	Invasive Ductal Breast Carcinoma (Adjacent normal tissues)	ER(+), PR(+), HER-2(-)
N3	57	I	T1cN0Mx	Invasive Ductal Breast Carcinoma (Adjacent normal tissues)	ER(+), PR(+), HER-2(-)
N4	48	I	T1cN0Mx	Invasive Ductal Breast Carcinoma (Adjacent normal tissues)	ER(+), PR(+), HER-2(-)
N5	52	I	pT1bNxMx	Invasive Ductal Breast Carcinoma (Adjacent normal tissues)	ER(+), PR(+), HER-2(-)
