# Supplementary material for: RETRACTED: Arginine methylation of SHANK2 by PRMT7 promotes human breast cancer metastasis through activating endosomal FAK signalling
Source: eLife journal article supplement (doi:10.7554/elife.57617), 2020-08-26
Supplement: supp [file elife_poa_e57617_Supplementary_file_2.xlsx]

## Sheet: Sheet1
Sample No.	Age	Stage	TNM	Cancer Type	Subtype
T1	41	II	T1cNxMx	Invasive Ductal Breast Carcinoma	ER(+), PR(+), HER-2(-)
T2	59	II	T2NxMx	Invasive Ductal Breast Carcinoma	ER(+), PR(+), HER-2(-)
T3	51	II	pT2N3bMx	Invasive Ductal Breast Carcinoma	ER(+), PR(+), HER-2(-)
T4	44	II	T2N2aMx	Invasive Ductal Breast Carcinoma	ER(+), PR(+), HER-2(-)
T5	62	II	T4bN1Mx	Invasive Ductal Breast Carcinoma	ER(+), PR(+), HER-2(-)
T6	57	II	pT2N1cMx	Invasive Ductal Breast Carcinoma	ER(+), PR(+), HER-2(-)
T7	61	II	T1cN0Mx	Invasive Ductal Breast Carcinoma	ER(+), PR(+), HER-2(-)
T8	56	II	T1cN1Mx	Invasive Ductal Breast Carcinoma	ER(+), PR(+), HER-2(-)
T9	56	III	pT1cN2aMx	Invasive Ductal Breast Carcinoma	ER(+), PR(+), HER-2(1+)
T10	49	II	T2N1Mx	Invasive Ductal Breast Carcinoma	ER(+), PR(+), HER-2(2+)
T11	46	II	pT1NxMx	Invasive Ductal Breast Carcinoma	ER(+), PR(+), HER-2(2+)
T12	42	II	pT1cN1cMx	Invasive Ductal Breast Carcinoma	ER(+), PR(+), HER-2(2+)
T13	47	III	pT1cN1Mx	Invasive Ductal Breast Carcinoma	ER(-), PR(-), HER-2(2+)
T14	47	III	pT1cN1Mx	Invasive Ductal Breast Carcinoma	ER(-), PR(-), HER-2(3+)
T15	79	III	pT2N2Mx	Invasive Ductal Breast Carcinoma	ER(-), PR(-), HER-2(2+)
T16	57	III	T1cNxMx	Invasive Ductal Breast Carcinoma	ER(-), PR(-), HER-2(3+)
T17	64	III	T2cNxMx	Invasive Ductal Breast Carcinoma	ER(-), PR(-), HER-2(3+)
T18	61	III	pT1cN2aMx	Invasive Ductal Breast Carcinoma	ER(-), PR(-), HER-2(3+)
T19	39	III	pT1cN3aMx	Invasive Ductal Breast Carcinoma	ER(-), PR(-), HER-2(-)
T20	59	III	pT1cN1Mx	Invasive Ductal Breast Carcinoma	ER(-), PR(-), HER-2(-)
T21	51	III	pT1cN1Mx	Invasive Ductal Breast Carcinoma	ER(-), PR(-), HER-2(-)
T22	50	III	T1cN1Mx	Invasive Ductal Breast Carcinoma	ER(-), PR(-), HER-2(-)
